# Supplementary material for: Donor-substituted phenyl-π-chromones: electrochemiluminescence and intriguing electronic properties
Source: Royal Society of Chemistry journal article supplement (doi:10.1039/b416319b), 2005-02-15
Supplement: b416319b.pdf [file b416319b.pdf]

# Donor-substituted Phenyl- $\pi$ -chromones: Electrochemiluminescence and Intriguing Electronic Properties

Shu-Wen Yang, Arumugasamy Elangovan and Tong-Ing Ho\*

*Department of Chemistry National Taiwan University, Taipei – 106, Taiwan.*

\*Corresponding author. E-mail: hall@ntu.edu.tw

## Electronic Supplementary Information

Characterization Data for compounds, UV and fluorescence spectra, and CV curves for **1-5** are furnished below. A comparative ECL and PL spectra and the X-ray crystallographic data of **4** are also appended at the end.

**3-Phenylethynyl-chromen-4-one (1)**: m.p.: 150 – 153 °C <sup>1</sup>H-NMR ( $\delta$ , ppm): 8.26 (d,  $J$  = 8 Hz, 1H), 8.22 (s, 1H), 7.67 (t,  $J$  = 8 Hz, 1H), 7.55 (m, 2H), 7.46 (d,  $J$  = 8.4 Hz, 1H), 7.42 (t,  $J$  = 8 Hz, 1H), 7.32 (m, 3H); <sup>13</sup>C NMR ( $\delta$ ): (100 MHz, CDCl<sub>3</sub>):  $\delta$  79.43, 94.95, 111.28, 118.09, 112.49, 123.41, 125.62, 126.11, 128.14, 128.50, 131.66, 133.85, 155.72, 157.69, 175.12; Mass Spectra ( $m/z$ ): 246.0682 (M<sup>+</sup>).

**3-*p*-Tolylethynyl-chromen-4-one (2)**: m.p.: 136 – 138 °C; <sup>1</sup>H NMR ( $\delta$ , ppm): 8.26 (d,  $J$  = 8 Hz, 1H), 8.20 (s, 1H), 7.67 (t,  $J$  = 8 Hz, 1H), 7.43 (m, 4H), 7.13 (d,  $J$  = 8.4 Hz, 2H), 2.34 (s, 3H); <sup>13</sup>C NMR ( $\delta$ ): (100 MHz, CDCl<sub>3</sub>,  $\delta$ , ppm): 21.66, 78.75, 95.18, 111.45, 118.07, 119.43, 123.42, 125.56, 126.11, 128.91, 131.56, 133.78, 138.66, 155.72, 157.52, 175.17; Mass Spectra ( $m/z$ ): 260.0839 (M<sup>+</sup>).

**3-(4-Methoxy-phenylethynyl)-chromen-4-one (3)**: m.p.: 130 – 131 °C; <sup>1</sup>H NMR ( $\delta$ , ppm): 8.25, (d,  $J$  = 8 Hz, 1H), 8.19 (s, 1H), 7.66 (t,  $J$  = 8.8 Hz, 1H), 7.45 (m, 4H), 6.85 (d,  $J$  = 8 Hz, 2H), 3.8 (s, 3H); <sup>13</sup>C NMR ( $\delta$ ): (100 MHz, CDCl<sub>3</sub>): 55.27, 78.06, 94.97, 111.46, 113.77, 114.56, 118.03, 123.32, 125.48, 126.01, 133.11, 133.72, 155.65, 157.33, 159.59, 175.18; Mass Spectra( $m/z$ ): 276.0787 (M<sup>+</sup>).

**3-(4-Isopropoxy-phenylethynyl)-chromen-4-one (4)**: m.p.: 130 – 133 °C; <sup>1</sup>H NMR ( $\delta$ , ppm): 8.25, (d,  $J$  = 8 Hz, 1H), 8.18 (s, 1H), 7.66 (t,  $J$  = 8 Hz, 1H), 7.43 (m, 4H), 6.82 (d,  $J$  = 6.8 Hz, 2H), 4.54 (t,  $J$  = 6.4 Hz, 1H), 1.32 (d,  $J$  = 6 Hz, 6H); <sup>13</sup>C NMR ( $\delta$ ): (100 MHz, CDCl<sub>3</sub>): 22.41, 70.23, 78.26, 95.48, 111.93, 114.56, 115.80, 118.39, 123.74, 125.84, 126.44, 133.52, 134.06, 156.06, 157.63, 158.39, 175.55; Mass Spectra ( $m/z$ ): 304.1098 (M<sup>+</sup>).

**3-[4-(2-Ethyl-hexyloxy)-phenylethynyl]-chromen-4-one (5)**: viscous liquid; <sup>1</sup>H NMR ( $\delta$ , ppm):8.25, (d,  $J$  = 8 Hz, 1H), 8.18 (s, 1H), 7.66 (t,  $J$  = 8.8 Hz, 1H), 7.43 (m, 4H), 6.84 (d,  $J$  = 6.8 Hz, 2H), 3.83 (d,  $J$  = 6 Hz, 2H), 1.9 (m, 2H), 1.4 (m, 7H), 0.90 (m, 6H); <sup>13</sup>C NMR ( $\delta$ ): (100 MHz, CDCl<sub>3</sub>): 11.21, 14.19, 23.11, 23.89, 29.13, 30.54, 39.34, 70.50, 76.68, 77.00, 77.32, 77.92, 95.19, 111.57, 114.23, 114.34, 118.04, 123.37, 125.48, 126.07, 133.09, 133.72, 155.69, 157.28, 159.49, 175.21; Mass Spectra ( $m/z$ ): 374.1885 (M<sup>+</sup>).



Figure S-1. UV-Spectra of **1** in various solvents.



Figure S-2. UV Spectra of **2** in various solvents.



Figure S-3. UV Spectra of **3** in various solvents.



Figure S-4. UV Spectra of **4** in various solvents.



Figure S-5. UV Spectra of **5** in various solvents.



Figure S-6. Fluorescence spectra of **1** in various solvents.



**Figure S-7.** Fluorescence spectra of **2** in various solvents.



**Figure S-8.** Fluorescence spectra of **3** in various solvents.



Figure S-9. Fluorescence spectra of **4** in various solvents.



Figure S-10. Fluorescence Spectra of **5** in various solvents.



**Figure S-11.** Typical CV curve for compound **1** against Ag/AgCl recorded in ACN ( $10^{-3}$ M with 50 mM TBAP).



**Figure S-12.** Typical CV curve for compound **2** against Ag/AgCl recorded in ACN ( $10^{-3}$ M with 50 mM TBAP).



**Figure S-13.** Typical CV curve for compound **3** against Ag/AgCl recorded in ACN ( $10^{-3}$ M with 50 mM TBAP).



**Figure S-14.** Typical CV curve for compound **4** against Ag/AgCl recorded in ACN ( $10^{-3}$ M with 50 mM TBAP).



**Figure S-15.** Typical CV curve for compound **5** against Ag/AgCl recorded in ACN ( $10^{-3}$ M with 50 mM TBAP).



**Figure S-16.** Typical CV curve for compound **6** against Ag/AgCl recorded in ACN ( $10^{-3}$ M with 50 mM TBAP); \* indicates interference caused by to incompletely removed oxygen/impurity.



**Figure S-17.** Comparative ECL (Squares) and PL (solid line) spectra of compound **4** showing close overlap of both the spectra recorded in ACN at room temperature.

Table 1. Crystal data and structure refinement for IC10593 Compound 4.

|                                      |                                                                                                                                |
|--------------------------------------|--------------------------------------------------------------------------------------------------------------------------------|
| Identification code                  | ic10593                                                                                                                        |
| Diffractometer used                  | Nonius KappaCCD                                                                                                                |
| Empirical formula                    | $C_{20}H_{16}O_3$                                                                                                              |
| Formula weight                       | 304.33                                                                                                                         |
| Temperature                          | 295(2) K                                                                                                                       |
| Wavelength                           | 0.71073 Å                                                                                                                      |
| Crystal system                       | Monoclinic                                                                                                                     |
| Space group                          | $P2_1/c$                                                                                                                       |
| Unit cell dimensions                 | $a = 14.2400(7)$ Å $\alpha = 90^\circ$<br>$b = 6.3210(4)$ Å $\beta = 98.915(3)^\circ$<br>$c = 36.476(2)$ Å $\gamma = 90^\circ$ |
| Volume, Z                            | $3243.6(3)$ Å <sup>3</sup> , 8                                                                                                 |
| Density (calculated)                 | $1.246$ Mg/m <sup>3</sup>                                                                                                      |
| Absorption coefficient               | $0.083$ mm <sup>-1</sup>                                                                                                       |
| F(000)                               | 1280                                                                                                                           |
| Crystal size                         | 0.30 x 0.20 x 0.15 mm                                                                                                          |
| $\theta$ range for data collection   | 1.13 to $24.97^\circ$                                                                                                          |
| Limiting indices                     | $-15 \leq h \leq 15$ , $-7 \leq k \leq 7$ , $-32 \leq l \leq 42$                                                               |
| Reflections collected                | 10293                                                                                                                          |
| Independent reflections              | 5291 ( $R_{int} = 0.1081$ )                                                                                                    |
| Absorption correction                | Multi-scan                                                                                                                     |
| Max. and min. transmission           | 0.998 and 0.922                                                                                                                |
| Refinement method                    | Full-matrix least-squares on $F^2$                                                                                             |
| Data / restraints / parameters       | 5200 / 0 / 416                                                                                                                 |
| Goodness-of-fit on $F^2$             | 1.672                                                                                                                          |
| Final R indices [ $I > 2\sigma(I)$ ] | $R1 = 0.1601$ , $wR2 = 0.3582$                                                                                                 |
| R indices (all data)                 | $R1 = 0.2998$ , $wR2 = 0.3932$                                                                                                 |
| Extinction coefficient               | $0.035(5)$                                                                                                                     |
| Largest diff. peak and hole          | $0.580$ and $-0.528$ eÅ <sup>-3</sup>                                                                                          |

Table 2. Bond lengths [Å] and angles [°] for 10593. Compound 4.

|                   |           |                   |           |
|-------------------|-----------|-------------------|-----------|
| O(1)-C(1)         | 1.359(9)  | O(1)-C(9)         | 1.390(10) |
| O(2)-C(3)         | 1.242(10) | O(3)-C(15)        | 1.362(9)  |
| O(3)-C(18)        | 1.447(10) | O(4)-C(21)        | 1.363(10) |
| O(4)-C(29)        | 1.377(10) | O(5)-C(23)        | 1.244(11) |
| O(6)-C(35)        | 1.357(9)  | O(6)-C(38)        | 1.439(11) |
| C(1)-C(2)         | 1.357(12) | C(2)-C(10)        | 1.417(12) |
| C(2)-C(3)         | 1.450(12) | C(3)-C(4)         | 1.439(11) |
| C(4)-C(9)         | 1.364(12) | C(4)-C(5)         | 1.435(12) |
| C(5)-C(6)         | 1.367(12) | C(6)-C(7)         | 1.40(2)   |
| C(7)-C(8)         | 1.38(2)   | C(8)-C(9)         | 1.395(11) |
| C(10)-C(11)       | 1.181(11) | C(11)-C(12)       | 1.437(12) |
| C(12)-C(13)       | 1.363(12) | C(12)-C(17)       | 1.386(12) |
| C(13)-C(14)       | 1.362(11) | C(14)-C(15)       | 1.366(12) |
| C(15)-C(16)       | 1.400(12) | C(16)-C(17)       | 1.378(10) |
| C(18)-C(19)       | 1.512(11) | C(18)-C(20)       | 1.541(13) |
| C(21)-C(22)       | 1.356(12) | C(22)-C(23)       | 1.413(12) |
| C(22)-C(30)       | 1.447(12) | C(23)-C(24)       | 1.466(11) |
| C(24)-C(25)       | 1.373(12) | C(24)-C(29)       | 1.375(12) |
| C(25)-C(26)       | 1.374(12) | C(26)-C(27)       | 1.354(14) |
| C(27)-C(28)       | 1.391(13) | C(28)-C(29)       | 1.375(11) |
| C(30)-C(31)       | 1.173(11) | C(31)-C(32)       | 1.448(11) |
| C(32)-C(33)       | 1.375(11) | C(32)-C(37)       | 1.409(12) |
| C(33)-C(34)       | 1.374(10) | C(34)-C(35)       | 1.372(12) |
| C(35)-C(36)       | 1.371(12) | C(36)-C(37)       | 1.396(11) |
| C(38)-C(40)       | 1.504(14) | C(38)-C(39)       | 1.506(12) |
|                   |           |                   |           |
| C(1)-O(1)-C(9)    | 118.6(7)  | C(15)-O(3)-C(18)  | 122.0(7)  |
| C(21)-O(4)-C(29)  | 118.7(7)  | C(35)-O(6)-C(38)  | 119.6(8)  |
| C(2)-C(1)-O(1)    | 125.8(8)  | C(1)-C(2)-C(10)   | 119.9(9)  |
| C(1)-C(2)-C(3)    | 116.6(8)  | C(10)-C(2)-C(3)   | 123.4(9)  |
| O(2)-C(3)-C(4)    | 123.7(10) | O(2)-C(3)-C(2)    | 118.9(9)  |
| C(4)-C(3)-C(2)    | 117.4(9)  | C(9)-C(4)-C(5)    | 116.9(8)  |
| C(9)-C(4)-C(3)    | 121.5(9)  | C(5)-C(4)-C(3)    | 121.5(9)  |
| C(6)-C(5)-C(4)    | 120.5(10) | C(5)-C(6)-C(7)    | 119.0(11) |
| C(8)-C(7)-C(6)    | 123.0(11) | C(7)-C(8)-C(9)    | 115.8(12) |
| C(4)-C(9)-O(1)    | 119.8(7)  | C(4)-C(9)-C(8)    | 124.6(10) |
| O(1)-C(9)-C(8)    | 115.4(10) | C(11)-C(10)-C(2)  | 178.0(11) |
| C(10)-C(11)-C(12) | 178.8(11) | C(13)-C(12)-C(17) | 117.2(8)  |
| C(13)-C(12)-C(11) | 123.2(9)  | C(17)-C(12)-C(11) | 119.6(9)  |
| C(14)-C(13)-C(12) | 121.1(9)  | C(13)-C(14)-C(15) | 121.9(10) |
| O(3)-C(15)-C(18)  | 117.3(9)  | O(3)-C(15)-C(16)  | 123.8(9)  |
| C(14)-C(15)-C(16) | 118.7(9)  | C(17)-C(16)-C(15) | 117.9(9)  |
| C(16)-C(17)-C(12) | 123.0(9)  | O(3)-C(18)-C(19)  | 106.1(8)  |
| O(3)-C(18)-C(20)  | 109.3(7)  | C(19)-C(18)-C(20) | 113.1(8)  |
| C(22)-C(21)-O(4)  | 123.0(8)  | C(21)-C(22)-C(23) | 120.5(9)  |
| C(21)-C(22)-C(30) | 117.4(9)  | C(23)-C(22)-C(30) | 122.0(9)  |
| O(5)-C(23)-C(22)  | 124.2(9)  | O(5)-C(23)-C(24)  | 119.0(10) |
| C(22)-C(23)-C(24) | 116.6(10) | C(25)-C(24)-C(29) | 118.1(9)  |
| C(25)-C(24)-C(23) | 123.0(10) | C(29)-C(24)-C(23) | 118.9(9)  |
| C(24)-C(25)-C(26) | 119.6(11) | C(27)-C(26)-C(25) | 122.2(10) |
| C(26)-C(27)-C(28) | 119.2(10) | C(29)-C(28)-C(27) | 118.2(10) |
| C(28)-C(29)-C(24) | 122.7(9)  | C(28)-C(29)-O(4)  | 115.2(9)  |
| C(24)-C(29)-O(4)  | 122.1(8)  | C(31)-C(30)-C(22) | 177.8(10) |
| C(30)-C(31)-C(32) | 176.6(9)  | C(33)-C(32)-C(37) | 118.2(8)  |
| C(33)-C(32)-C(31) | 122.5(9)  | C(37)-C(32)-C(31) | 119.2(9)  |
| C(32)-C(33)-C(34) | 121.1(9)  | C(35)-C(34)-C(33) | 121.2(9)  |
| O(6)-C(35)-C(36)  | 125.5(9)  | O(6)-C(35)-C(34)  | 115.4(9)  |
| C(36)-C(35)-C(34) | 119.0(8)  | C(35)-C(36)-C(37) | 120.8(9)  |
| C(36)-C(37)-C(32) | 119.7(9)  | O(6)-C(38)-C(40)  | 113.2(8)  |
| O(6)-C(38)-C(39)  | 105.3(9)  | C(40)-C(38)-C(39) | 112.4(8)  |

Symmetry transformations used to generate equivalent atoms:

-----End of Electronic Supplementary Information-----
